# Supplementary material
Source: publisher site journal article supplement (https://www.degruyterbrill.com/publication/isbn/9783110285925/downloadAsset/9783110285925_Inhaltsverzeichnis.pdf)
Supplement: Supplementary file 1 [file 9783110285925_Inhaltsverzeichnis.pdf]

# Inhalt

## Vorwort — V

### 1 Kommunikationstheoretische Merkmale — 1

- 1.1 Massenkommunikation — 1
- 1.2 Die Kommunikatoren — 5
- 1.3 Die Rezipienten — 8
- 1.4 Richtung der Kommunikation — 14
- 1.5 Kommunikationskreise — 23
- 1.6 Kommunikative Funktionen — 26
- 1.7 Öffentlich – privat — 29
- 1.8 Raumzeitliche Konstellation zwischen Kommunikator, Text und Rezipient — 34

### 2 Historische Aspekte — 39

- 2.1 Grundsätzliches und Forschungsgeschichtliches — 39
- 2.2 Die Zeitung vom 17. bis 19. Jahrhundert — 41
  - 2.2.1 Die Anfänge — 41
  - 2.2.2 Externe Bedingungen — 44
    - 2.2.2.1 Autoren, Schreiborte und Übermittlungswege — 44
    - 2.2.2.2 Informationsgewinnung — 45
    - 2.2.2.3 Thematische Aspekte — 46
    - 2.2.2.4 Rezeption der Zeitung — 47
  - 2.2.3 Struktur der Zeitung — 47
  - 2.2.4 Sprache der Texte — 50
  - 2.2.5 Unterhaltende Beiträge — 53
  - 2.2.6 Information und Meinungsbildung — 56
  - 2.2.7 Stilistische Vorbilder — 58
  - 2.2.8 Professionalisierung und ihre sprachlichen Folgen — 60
- 2.3 Neue subsidiäre Medien — 63
- 2.4 Zwischen Film und Fernsehen: die Wochenschau — 65
- 2.5 Geschichte der Fernsehnachrichten — 83

### 3 Der Medientext — 93

- 3.1 Objekt der Medienlinguistik — 93
- 3.2 Semiotische Elemente — 95
- 3.3 Abgrenzungsprobleme – Übergangsbereiche — 99

**4 Intertextualität — 103**

- 4.1 Grundbegriffe — 103
  - 4.1.1 Diachrone Intertextualität — 107
  - 4.1.2 Synchrone Intertextualität — 120
  - 4.1.3 Typologische Intertextualität — 121
  - 4.1.4 Inter- und intratextuelle Relationen — 122
- 4.2 Das Zitat — 123
  - 4.2.1 Grundbegriffe — 123
    - 4.2.1.1 Zitat — 123
    - 4.2.1.2 Direkte/indirekte Rede — 124
    - 4.2.1.3 Slipping — 125
    - 4.2.1.4 Teil-Zitat — 125
    - 4.2.1.5 Redesignalisierende Verben — 126
    - 4.2.1.6 Die Quelle des Zitats — 128
  - 4.2.2 Formen und Funktionen medialen Zitierens — 129
    - 4.2.2.1 Direkte Rede in Zeitungen — 129
    - 4.2.2.2 Original-Zitate in Radio und Fernsehen — 133
    - 4.2.2.3 Unterschiede zwischen den Medien — 140
    - 4.2.2.4 Gesprochenes vs. geschriebenes Zitat — 143
    - 4.2.2.5 Bild- und Musikzitat — 145

**5 Intratextualität — 147**

- 5.1 Schlagzeilen und Lead in der Presse — 147
  - 5.1.1 Schlagzeilen — 147
  - 5.1.2 Lead — 154
- 5.2 Intratextualität in Radio und Fernsehen — 155
  - 5.2.1 Typen von Intratextualität — 155
  - 5.2.2 Schlagzeilen im Radio — 157
  - 5.2.3 Schlagzeilen im Fernsehen — 158
- 5.3 Zwischen Inter- und Intratext — 161
  - 5.3.1 Programmverbindungen — 161
  - 5.3.2 Weitere Grenzbereiche — 169
- 5.4 Das Zusammenspiel von inter- und intratextuellen Bezügen — 170

**6 Mündlichkeit und Schriftlichkeit — 173**

- 6.1 Linguistische Konzepte und Termini — 173
- 6.2 Dialog in der Presse — 176
- 6.3 Schrift im Fernsehen — 180
  - 6.3.1 Intradiegetische Texte — 180

|          |                                                               |            |
|----------|---------------------------------------------------------------|------------|
| 6.3.2    | Extradiegetische Texte —                                      | 181        |
| 6.3.3    | Intra- und extradiegetische Texte im gleichen Beitrag —       | 186        |
| 6.4      | Sekundär gesprochene Texte —                                  | 189        |
| 6.5      | Primär gesprochene Texte —                                    | 191        |
| <b>7</b> | <b>Realität – Fiktion – Inszenierung —</b>                    | <b>201</b> |
| 7.1      | Realität und Fiktionalisierung —                              | 201        |
| 7.2      | Außermediale Realität, die im Medium „nur“ präsentiert wird — | 205        |
| 7.3      | Innermediale nicht-fiktionale Realität —                      | 209        |
| 7.4      | Im Medium nachgespielte außermediale Wirklichkeit —           | 211        |
| 7.5      | Spiel mit Realität und Fiktion: die versteckte Kamera —       | 214        |
| 7.6      | Nicht ohne weiteres erkennbare Arten von Fiktionalisierung —  | 214        |
| <b>8</b> | <b>Presse-Textsorten —</b>                                    | <b>219</b> |
| 8.1      | Medientextsorten – Allgemeines —                              | 219        |
| 8.2      | Kriterien und Klassifikationen —                              | 220        |
| 8.3      | Einzelne Textsorten —                                         | 227        |
| 8.3.1    | Meldung —                                                     | 227        |
| 8.3.2    | Bericht —                                                     | 228        |
| 8.3.3    | Kommentar —                                                   | 229        |
| 8.3.4    | Reportage —                                                   | 230        |
| 8.3.5    | Interview und Zitatenbericht —                                | 234        |
| 8.4      | Tendenzen —                                                   | 236        |
| 8.4.1    | Vermischung der Textsorten —                                  | 237        |
| 8.4.2    | Annäherung an den Hypertext —                                 | 249        |
| 8.4.3    | Ein neuer Presse-Typ: Gratispresse —                          | 251        |
| <b>9</b> | <b>Nachrichtensendungen —</b>                                 | <b>255</b> |
| 9.1      | Radionachrichten —                                            | 255        |
| 9.1.1    | Standard-Form —                                               | 256        |
| 9.1.2    | Nachrichtenmagazine —                                         | 267        |
| 9.2      | Textsorten in Fernsehnachrichten —                            | 271        |
| 9.2.1    | Formate —                                                     | 271        |
| 9.2.2    | Textsorten —                                                  | 273        |
| 9.2.3    | Zur Sprache einzelner Textsorten —                            | 280        |
| 9.2.3.1  | Sprechermeldung und Anmoderation —                            | 280        |
| 9.2.3.2  | Filmmeldung —                                                 | 283        |
| 9.2.3.3  | Korrespondentenbericht —                                      | 284        |

|           |                                            |            |
|-----------|--------------------------------------------|------------|
| 9.2.3.4   | Kommentar —                                | 292        |
| 9.2.3.5   | Interview —                                | 295        |
| 9.2.3.6   | Statement —                                | 299        |
| 9.2.4     | Tendenzen —                                | 300        |
| 9.3       | Narration —                                | 304        |
| 9.3.1     | Nachrichten als Erzählungen —              | 304        |
| 9.3.2     | Der Erzähler als Interpret —               | 311        |
| 9.3.3     | Die Perspektivik des Erzählers —           | 312        |
| 9.3.4     | Das Wissen des Erzählers —                 | 316        |
| 9.3.5     | Die Quellen der erzählten Geschichte —     | 320        |
| 9.3.6     | Der TEXT des Erzählers —                   | 325        |
| <b>10</b> | <b>Moderation —</b>                        | <b>329</b> |
| 10.1      | Magazin und Moderation —                   | 329        |
| 10.2      | Moderation in Radio-Begleitprogrammen —    | 334        |
| 10.2.1    | Das Konzept „Moderator“ —                  | 334        |
| 10.2.2    | Der Text des Moderators —                  | 336        |
| 10.2.2.1  | Kurztexpte —                               | 336        |
| 10.2.2.2  | Scherz und Ernst —                         | 338        |
| 10.2.3    | Der Moderator und sein situatives Umfeld — | 341        |
| 10.2.4    | Veränderungen —                            | 346        |
| 10.2.4.1  | Co-Moderation —                            | 346        |
| 10.2.4.2  | Formalität und Informalität —              | 351        |
| 10.2.4.3  | Erweitertes Funktionsspektrum —            | 352        |
| 10.2.4.4  | Hörer-Telefon —                            | 355        |
| 10.2.4.5  | Scharnierfunktion —                        | 358        |
| <b>11</b> | <b>Fachexterne Kommunikation —</b>         | <b>361</b> |
| 11.1      | Fachkommunikation – Medienkommunikation —  | 361        |
| 11.2      | Techniken der Vermittlung von Fachwissen — | 364        |
| 11.2.1    | Lexikalische Erläuterungen —               | 365        |
| 11.2.2    | Reduktion der Komplexität —                | 367        |
| 11.2.3    | Personalisierung —                         | 368        |
| 11.2.4    | Dramatisierung und Emotionalisierung —     | 369        |
| 11.3      | Zwei zusammenhängende Beispiele —          | 369        |
| 11.3.1    | Presse: Das schwarze Loch —                | 369        |
| 11.3.2    | Fernsehen: Gesundheitssendung —            | 375        |
| 11.4      | Vergleich der Medien —                     | 381        |

**12 Areale Aspekte — 383**

- 12.1 Die nationalen Varianten des Deutschen — **383**
- 12.2 Standardsprache – Umgangssprache – Mundarten — **385**
- 12.3 Ein Beispiel: Deutsche Schweiz — **390**
- 12.3.1 Diglossie in den Medien — **390**
- 12.3.2 Radio — **394**
- 12.3.3 Fernsehen — **396**
- 12.3.3.1 Die Verteilung der Varietäten — **396**
- 12.3.3.2 Faktoren der Sprachwahl im einzelnen — **398**

**13 Text und Bild — 407**

- 13.1 Das Problem — **407**
- 13.2 Das Bild — **408**
- 13.2.1 Produktion — **409**
- 13.2.2 Mediale Aspekte — **410**
- 13.2.3 Semantische Aspekte — **410**
- 13.2.4 Semiotische Aspekte — **413**
- 13.2.5 Pragmatisch-funktionale Aspekte — **417**
- 13.2.6 Interaktive Aspekte — **418**
- 13.3 Text – Bild – Relationen — **420**
- 13.3.1 Formale Relationen — **421**
- 13.3.1.1 Intradiegetisch/extradiegetisch — **421**
- 13.3.1.2 Synchron/ asynchron — **422**
- 13.3.1.3 Syntop/asyntop — **423**
- 13.3.1.4 live/non-live — **424**
- 13.3.1.5 Überlappend/nicht-überlappend — **425**
- 13.3.2 Semantische Relationen — **425**
- 13.3.3 Pragmatisch-funktionale Relationen — **433**
- 13.3.4 Der Fluss der Informationen auf beiden Kanälen und ihr wechselseitiger Bezug — **443**

**14 „Neue Medien“ — 445**

- 14.1 „Massenmedien“ in den „Neuen Medien“ — **445**
- 14.2 Hypertexte — **448**
- 14.3 Online-Zeitungen und Online-Zeitschriften — **451**
- 14.3.1 Multimodalität: Text, Bild, Film und Ton — **453**
- 14.3.2 Non-Linearität: Cluster-Texte — **457**
- 14.3.3 Interaktivität/Interaktion: Leserbriefe, Kommentarfunktion, Diskussionsforen — **462**
- 14.3.4 Virtualität — **469**

- 14.4        Hypertext-typische Gestaltungsprobleme bei  
              Online-Zeitungen — **470**
- 14.4.1     Die Einstiegsseite — **471**
- 14.4.2     Navigation — **477**
- 14.4.3     Sequenzierung und Rahmung — **482**
- 14.4.4     Online-Zeitung: Kopie oder Alternative zur Printversion? — **483**

**15        „Made-for-mobile“: Analoge und digitale Zeitungen im  
              Vergleich — 487**

- 15.1        Transmedialität – Intermedialität – Medienwechsel — **488**
- 15.2        Intermedialer Vergleich — **490**

**Literaturverzeichnis — 501**

**Anhang — 523**

Transkriptionsrichtlinien — **523**

Abkürzungen für Medien — **525**

**Index — 527**
